# Supplementary material for: The effect of laparoscopic resection of large niches in the uterine caesarean scar on symptoms, ultrasound findings and quality of life: a prospective cohort study
Source: PubMed Central journal article supplement — BJOG. 2017 Aug 28;125(3):317–25. doi: 10.1111/1471-0528.14822 (PMC5811817; doi:10.1111/1471-0528.14822), 2017-08-28
Supplement: BJO-125-317-s001.pdf [file BJO-125-317-s001.pdf]

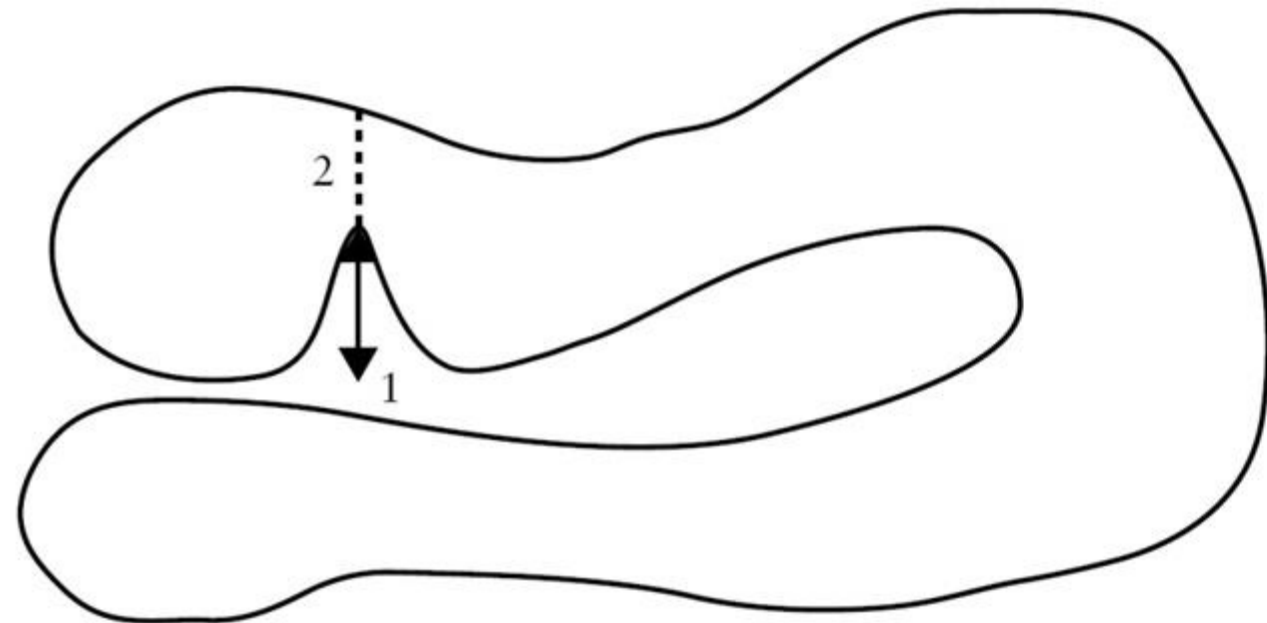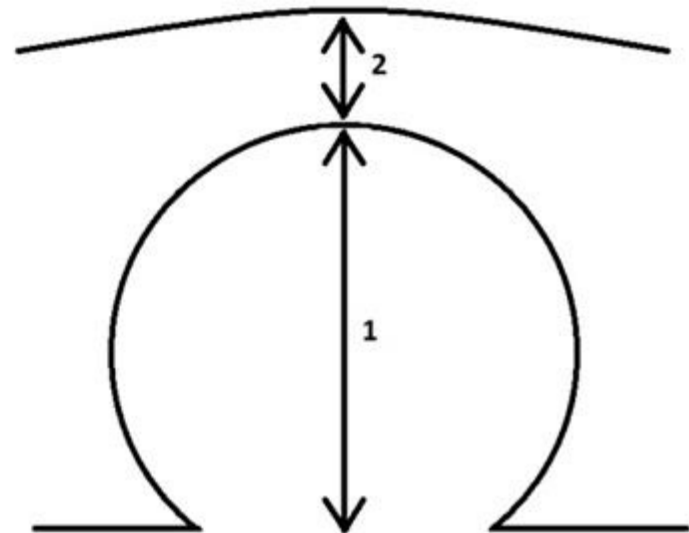

**Figure S1** Niche measurements using sonography

Schematic drawing demonstrating how to measure a niche in the sagittal and transversal plane. The depth of the niche is measured from the usual limit from the uterine cavity until the apex of the niche (1), the remaining myometrium from the apex of the niche until the serosa (2). Figure S1 was published by [Bij de Vaate et. al 2011 \(1\)](#).
