# Supplementary material for: The effect of laparoscopic resection of large niches in the uterine caesarean scar on symptoms, ultrasound findings and quality of life: a prospective cohort study
Source: PubMed Central journal article supplement — BJOG. 2017 Aug 28;125(3):317–25. doi: 10.1111/1471-0528.14822 (PMC5811817; doi:10.1111/1471-0528.14822), 2017-08-28
Supplement: BJO-125-317-s003.pdf [file BJO-125-317-s003.pdf]

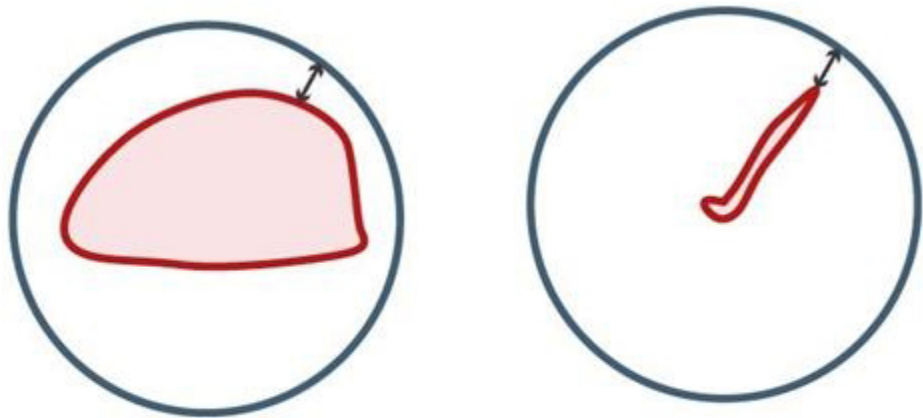

**Figure S3** Measurement of a comparable RM in two niches with different volumes  
Schematic drawing of a transvaginal sonographic displayed niche in the transversal plane to illustrate that RM may be equal even if volume is different
