# Supplementary material for: The effect of laparoscopic resection of large niches in the uterine caesarean scar on symptoms, ultrasound findings and quality of life: a prospective cohort study
Source: PubMed Central journal article supplement — BJOG. 2017 Aug 28;125(3):317–25. doi: 10.1111/1471-0528.14822 (PMC5811817; doi:10.1111/1471-0528.14822), 2017-08-28
Supplement: BJO-125-317-s004.pdf [file BJO-125-317-s004.pdf]

**Table S1. Surgical outcomes**

| Parameter                                                                                           | n=101           |
|-----------------------------------------------------------------------------------------------------|-----------------|
| Median operating time (min)                                                                         | 150 (120-177.5) |
| Median blood loss (ml)                                                                              | 50 (25-100)     |
| Endometriosis objectivized during intervention                                                      | 23 (22.8%)      |
| Additional perioperative interventions                                                              |                 |
| <i>Shortening of the round ligaments</i>                                                            | 28 (29.5%)      |
| Satisfaction gynaecologist with the hysteroscopic result                                            |                 |
| <i>Satisfied(score of 3 to 5 on a scale of 0-5)</i>                                                 | 91(90.1%)       |
| <i>Dissatisfied(score of 0 to 2 on a scale of 0-5)</i>                                              | 0               |
| <i>Not Reported</i>                                                                                 | 10 (9.9%)       |
| Peroperative complications                                                                          |                 |
| <i>Conversion to laparotomy due to an entry related vessel injury</i>                               | 1 (1%)          |
| <i>Bladder injury (only muscular layer), immediately sutured</i>                                    | 2 (2%)          |
| <i>Epigastric bleeding observed after removal of the trocar, immediately sutured by laparoscopy</i> | 1 (1%)          |
| <i>Perforation uterus with hysteroscope</i>                                                         | 1 (1%)          |
| Postoperative complications                                                                         |                 |
| <i>Fever</i>                                                                                        | 1 (1%)          |
| <i>Urinary tract infection</i>                                                                      | 2 (2%)          |
| Hysteroscopic result immediately after repair at the end of the intervention                        |                 |
| <i>Niche completely disappeared</i>                                                                 | 50 (56.2%)      |
| <i>A residual small niche of less than 1 mm width and depth</i>                                     | 39 (43.8%)      |
| <i>Niche larger than 1mm</i>                                                                        | 0               |
| Postoperative hospital stay (nights)                                                                | 1 (1-2)         |

Data are reported as median (interquartile range (IQR)) or n (valid %).
