# Supplementary material for: The effect of laparoscopic resection of large niches in the uterine caesarean scar on symptoms, ultrasound findings and quality of life: a prospective cohort study
Source: PubMed Central journal article supplement — BJOG. 2017 Aug 28;125(3):317–25. doi: 10.1111/1471-0528.14822 (PMC5811817; doi:10.1111/1471-0528.14822), 2017-08-28
Supplement: BJO-125-317-s005.pdf [file BJO-125-317-s005.pdf]

**Table S2.** Reduction of the main problem

| <b>Parameter</b>                                      | <b>6 months</b> |
|-------------------------------------------------------|-----------------|
| <i>Postmenstrual spotting</i>                         | 41/56 (73.2%)   |
| <i>Dysmenorrhea</i>                                   | 7/11(63.6%)     |
| <i>Intrauterine fluid</i>                             | 27/28 (96.4%)   |
| <i>Reconstructing anatomy for fertility treatment</i> | 5/6 (83.3%)     |

*Data are reported as n of women with a reduction of the reported main symptom/all women with reported main symptom at baseline (valid %).*
