# Supplementary material for: The effect of laparoscopic resection of large niches in the uterine caesarean scar on symptoms, ultrasound findings and quality of life: a prospective cohort study
Source: PubMed Central journal article supplement — BJOG. 2017 Aug 28;125(3):317–25. doi: 10.1111/1471-0528.14822 (PMC5811817; doi:10.1111/1471-0528.14822), 2017-08-28
Supplement: BJO-125-317-s006.pdf [file BJO-125-317-s006.pdf]

**Table S3.** Subgroup analyses on menstrual characteristics excluding women with amenorrhea due to continuous oral contraceptive use, levonorgestrel IUD or pregnancy

| Parameter                                       | Baseline      | 6 months      | P-value |
|-------------------------------------------------|---------------|---------------|---------|
| Days of clear red bloodloss during menstruation | 4 (3-5)       | 4 (3-5)       | 0.70    |
| Total days of spotting (postmenstrual spotting) | 9 (6-14)      | 1 (0-3)       | < 0.01  |
| Intermenstrual spotting (days)                  | 5 (1-10)      | 0 (0-0)       | < 0.01  |
| Discomfort due to spotting (scale 0-10)         | 7.2 (5.0-9.0) | 0 (0-3.0)     | < 0.01  |
| Dysmenorrhea (scale 0-10)                       | 6.0 (4.0-8.0) | 4.0 (0.0-7.0) | < 0.01  |

*Data are reported as median (IQR) or as n (valid %).*

*All menstrual characteristics are reported for women with postmenstrual spotting at baseline, except for dysmenorrhea. Dysmenorrhea is reported for all women.*
