# Supplementary material for: The effect of laparoscopic resection of large niches in the uterine caesarean scar on symptoms, ultrasound findings and quality of life: a prospective cohort study
Source: PubMed Central journal article supplement — BJOG. 2017 Aug 28;125(3):317–25. doi: 10.1111/1471-0528.14822 (PMC5811817; doi:10.1111/1471-0528.14822), 2017-08-28
Supplement: BJO-125-317-s007.pdf [file BJO-125-317-s007.pdf]

**Table S4.** Quality of life\* and women's satisfaction

| <b>Parameter</b>                           | <b>Baseline</b>    | <b>3 months</b>  | <b>P-value</b> |
|--------------------------------------------|--------------------|------------------|----------------|
| Quality of life – physical component scale | 52.6 (46.3 – 57.8) | 55.2 (47.7-58.2) | <b>0.04</b>    |
| Quality of life – mental component scale   | 39.2 (34.3-43.2)   | 37.4 (34.7-41.3) | 0.44           |
|                                            | <b>Baseline</b>    | <b>6 months</b>  | <b>P-value</b> |
| Patient satisfaction (scale 1-5)           |                    |                  |                |
| (Very) satisfied                           | n.a.               | 45 (83.3%)       | n.a.           |
| Dissatisfied/neutral                       | n.a.               | 9 (16.7%)        | n.a.           |

*Data are reported as median (IQR) or as n (valid %).*

*\* Quality of life was measured with the SF-36. SF-36 scores have a range of 0-100.*
