# Supplementary figures and images for: The effect of laparoscopic resection of large niches in the uterine caesarean scar on symptoms, ultrasound findings and quality of life: a prospective cohort study
Source: PubMed Central journal article supplement — BJOG. 2017 Aug 28;125(3):317–25. doi: 10.1111/1471-0528.14822 (PMC5811817; doi:10.1111/1471-0528.14822), 2017-08-28

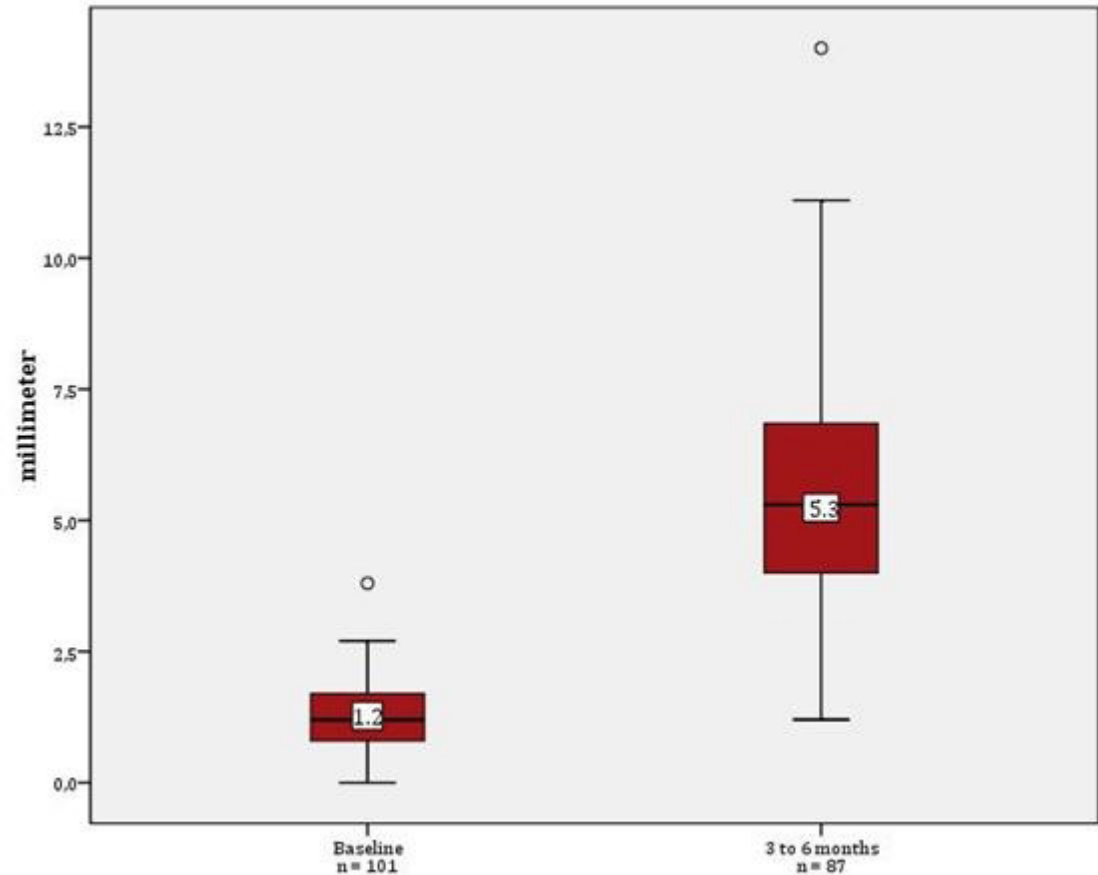

**Figure S2** Median residual myometrium at baseline and between 3 to 6 months follow-up

Supplement: BJO-125-317-s002.pdf [file BJO-125-317-s002.pdf]
